# Supplementary material for: Changed epitopes drive the antigenic drift for influenza A (H3N2) viruses
Source: PubMed Central journal article supplement (PMC3044287; doi:10.1186/1471-2105-12-s1-s31), 2011-02-15
Supplement: 1471-2105-12-S1-S31-S1.pdf [file 1471-2105-12-S1-S31-S1.pdf]

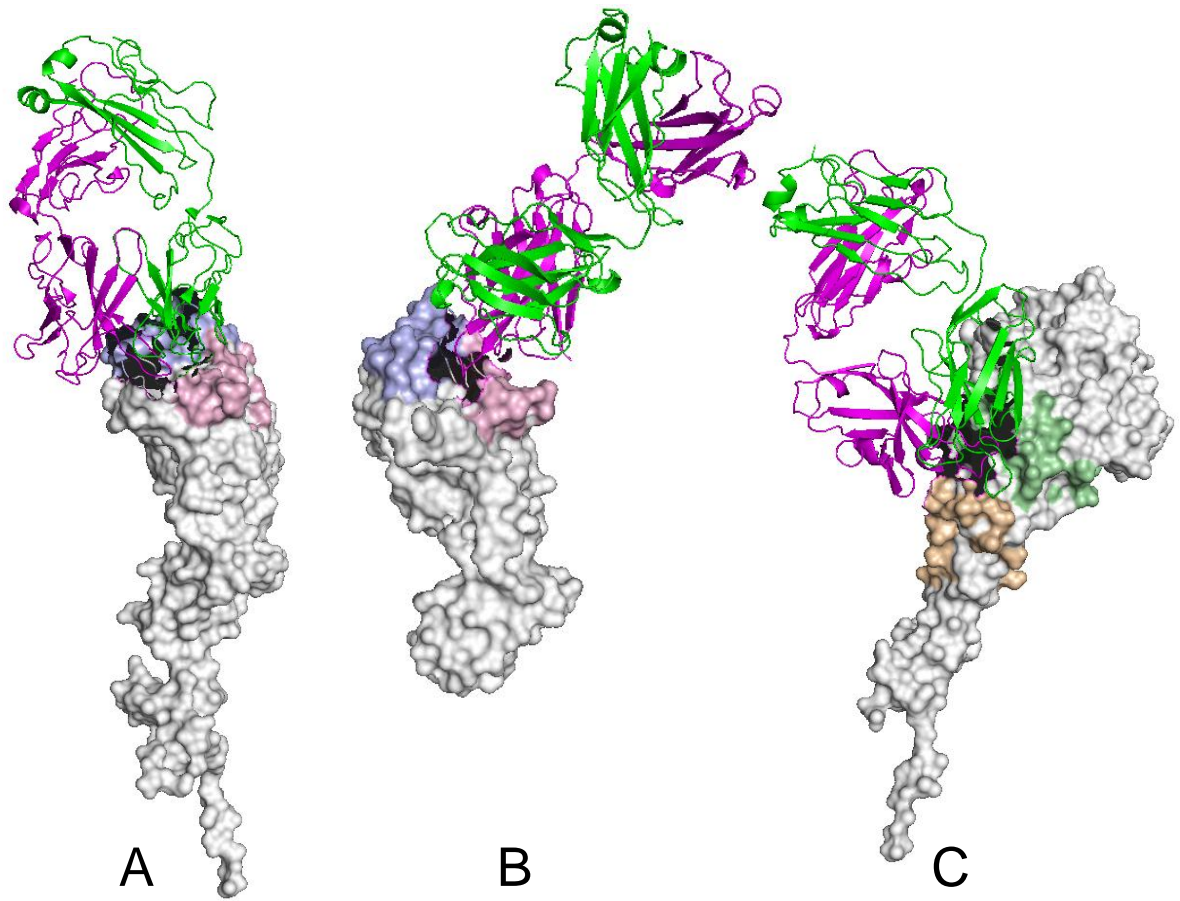

**Supplementary Figure S1** : The three HA-antibody complex structures. PDB codes are (A) 1KEN [1], (B) 2VIR [2], and (C) 1QFU [3].

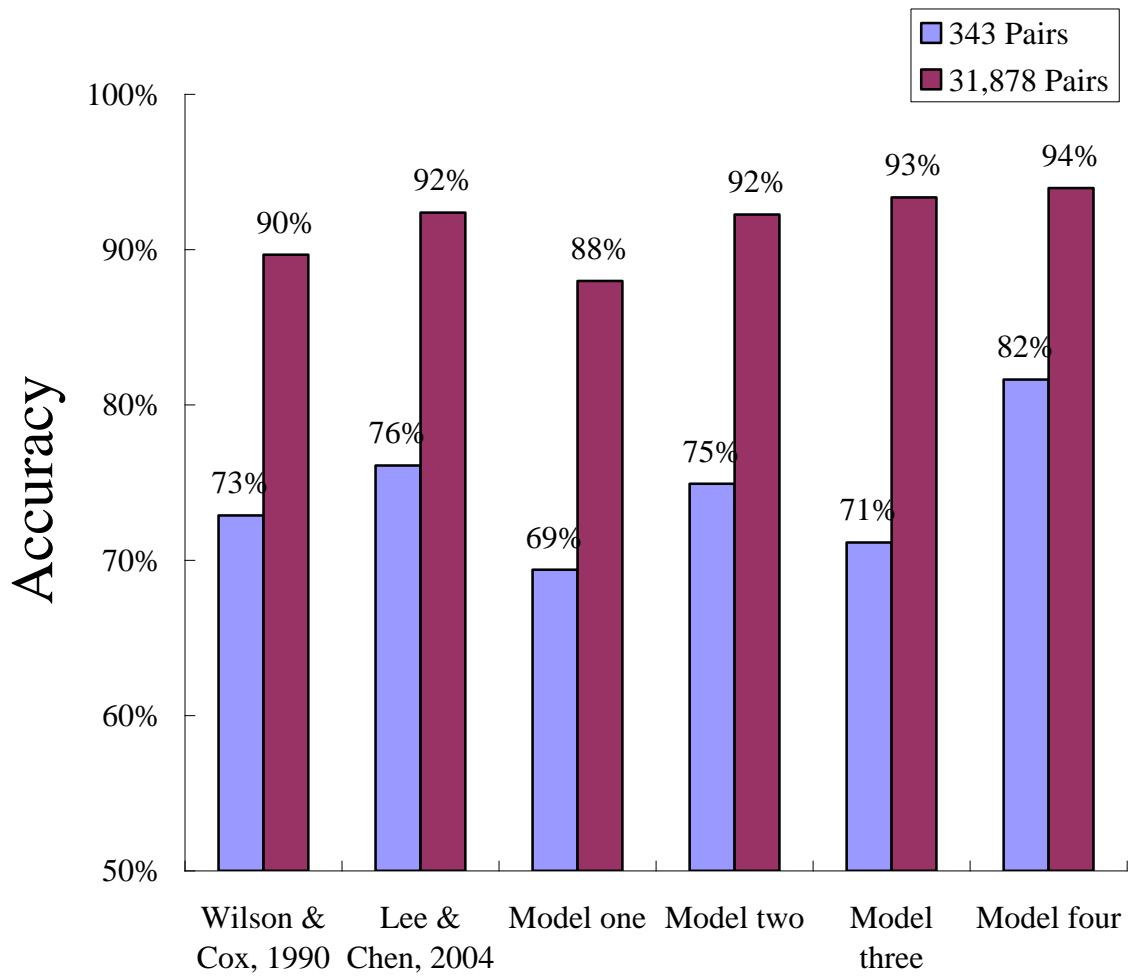

**Supplementary Figure S2 : Compare our method with other two methods on predicting antigenic variants on two data sets.**

**Supplementary Table S1 : The number of HI assays and number of sequences in Smith's dataset and WER strains from 1968 to 2009**

| Year         | HI-assay data set | Smith's data set [4] | WER strain <sup>1</sup>                     |
|--------------|-------------------|----------------------|---------------------------------------------|
| 1968         | 0                 | 4                    | A/Hong Kong/1/68                            |
| 1969         | 0                 | 3                    | A/Hong Kong/1/68                            |
| 1970         | 1 [5]             | 2                    | A/Hong Kong/1/68                            |
| 1971         | 2 [5]             | 4                    | A/Hong Kong/1/68                            |
| 1972         | 2 [5]             | 5                    | A/Hong Kong/1/68                            |
| 1973         | 2 [5]             | 4                    | A/England/42/72                             |
| 1974         | 3 [5]             | 5                    | A/Port Chalmers/1/73                        |
| 1975         | 6 [5]             | 3                    | A/Port Chalmers/1/73                        |
| 1976         | 7 [5]             | 6                    | A/Victoria/3/75                             |
| 1977         | 4 [5]             | 5                    | A/Victoria/3/75                             |
| 1978         | 0                 | 0                    | A/Texas/1/77                                |
| 1979         | 0                 | 0                    | A/Texas/1/77                                |
| 1980         | 6 [5]             | 2                    | A/Bangkok/1/79                              |
| 1981         | 0                 | 1                    | A/Bangkok/1/79                              |
| 1982         | 3 [5]             | 4                    | A/Bangkok/1/79                              |
| 1983         | 5 [5], 23[6]      | 1                    | A/Phillipines/2/82                          |
| 1984         | 0                 | 1                    | A/Phillipines/2/82                          |
| 1985         | 3 [5]             | 4                    | A/Phillipines/2/82                          |
| 1986         | 9 [5]             | 2                    | A/Christchurch/4/85,<br>A/Mississippi/1/85  |
| 1987         | 3 [5]             | 3                    | A/Leningrad/360/86                          |
| 1988         | 17 [5]            | 4                    | A/Sichuan/2/87                              |
| 1989         | 0                 | 16                   | Si/87; Sh/87                                |
| 1990         | 10 [5]            | 5                    | A/Shanghai/11/87                            |
| 1991         | 5 [5]             | 17                   | A/Beijing/353/89                            |
| 1992         | 5 [5]             | 45                   | A/Beijing/353/89                            |
| 1993         | 21 [5]            | 43                   | A/Beijing/32/92                             |
| 1994         | 6 [5]             | 10                   | A/Shangdong/9/93                            |
| 1995         | 3 [5], 20 [7]     | 15                   | A/Johannesburg/33/94                        |
| 1996         | 12 [5]            | 10                   | A/Johannesburg/33/94                        |
| 1997         | 28 [8]            | 9                    | A/Wuhan/359/95                              |
| 1998         | 3 [5]             | 4                    | A/Wuhan/359/95;<br>A/Sydney/5/97            |
| 1999         | 2 [5]             | 3                    | A/Sydney/5/97                               |
| 2000         | 0                 | 1                    | A/Moscow/10/99 <sup>2</sup>                 |
| 2001         | 11 [9]            | 3                    | A/Moscow/10/99                              |
| 2002         | 0                 | 3                    | A/Moscow/10/99                              |
| 2003         | 11[5], 20 [10]    | 6                    | A/Moscow/10/99                              |
| 2004         | 4 [5], 17 [10]    | 0                    | A/Fujian/411/2002                           |
| 2005         | 14 [5], 1 [10]    | 0                    | A/California/7/2004                         |
| 2006         | 11 [5], 9 [10]    | 0                    | A/California/7/2004;<br>A/Wisconsin/67/2005 |
| 2007         | 3 [5], 31 [11]    | 0                    | A/Wisconsin/67/2005;<br>A/Brisbane/10/2007  |
| 2008         | 0                 | 0                    | A/Brisbane/10/2007                          |
| 2009         | 0                 | 0                    | A/Brisbane/10/2007                          |
| <b>Total</b> | <b>343 pairs</b>  | <b>253 sequences</b> |                                             |

<sup>1</sup> WER strain is the dominant virus in influenza season reported by WHO.

<sup>2</sup> The widely used vaccine strain A/Panama/2007/99 was used instead in following years.

## Supplementary Table S2 : The list of 64 selected critical positions

| List of critical positions |                                                             |
|----------------------------|-------------------------------------------------------------|
| Epitope A                  | 122,124,126,131,133,135,137,140,143,144,145,146             |
| Epitope B                  | 128,155,156,157,158,159,160,164,186,188,189,193,196,197,198 |
| Epitope C                  | 50,53,54,275,276,278,307                                    |
| Epitope D                  | 121,172,174,201,207,213,216,217,230,242,244,248             |
| Epitope E                  | 62,63,75,78,82,83,260,262                                   |
| Other area                 | 2,3,9,25,31,199,202,222,225,326                             |

## Supplementary Table S3 : The 13 antigenic variants without changed epitopes

| Virus A             | Virus B             | Type (A to B) <sup>1</sup> | Type (B to A) <sup>2</sup> | HD | Epitope A | Epitope B     | Epitope C | Epitope D         | Epitope E |
|---------------------|---------------------|----------------------------|----------------------------|----|-----------|---------------|-----------|-------------------|-----------|
| A/Alaska/10/95      | A/Idaho/4/95        | V                          | S                          | 3  | 145       | 165           | 312       |                   |           |
| A/Alaska/10/95      | A/Wuhan/359/95      | V                          | S                          | 5  | 135       | 165, 194      | 275       |                   | 262       |
| A/Alaska/10/95      | A/Hongkong/55/95    | V                          | S                          | 7  | 135, 138  | 165           | 275       | 167, 226          | 262       |
| A/Alaska/10/95      | A/Shanghai/9/95     | V                          | S                          | 7  | 135       | 165, 193, 194 | 275       | 226               | 262       |
| A/Anhui/1239/2005   | A/Wisconsin/67/2005 | V                          | S                          | 5  | 122, 138  | 160           |           |                   |           |
| A/Fujian/140/2000   | A/Chile/6416/2001   | V                          | S                          | 12 | 144       | 186, 194      | 273       | 226, 246, 247     |           |
| A/Hong_Kong/1/94    | A/Guangdong/25/93   | V                          | S                          | 8  | 124       |               | 47, 299   | 96, 216, 219, 226 | 92        |
| A/Panama/2007/99    | A/Chile/6416/2001   | V                          | S                          | 7  | 144       | 186           |           | 246               |           |
| A/Wellington/1/2004 | A/Singapore/68/2004 | V                          | S                          | 9  | 145       | 189           | 50        | 226, 227          | 94        |
| A/Wellington/1/2004 | A/Victoria/513/2004 | V                          | S                          | 5  | 145       | 186, 190      |           | 167, 226          |           |
| A/Wellington/1/2004 | A/Wisconsin/19/2004 | V                          | S                          | 5  | 138, 145  | 186           | 278       | 226               |           |
| A/Fujian/140/2000   | A/NewYork/55/2001   | V                          | V                          | 12 | 144       | 186, 194      | 273       | 226, 229, 247     |           |
| A/Victoria/3/75     | A/Victoria/112/76   | V                          | V                          | 2  |           |               |           | 229               |           |

<sup>1</sup> the antigenic type of virus B relative to antisera against virus A.

<sup>2</sup> the antigenic type of virus A relative to antisera against virus B.

## References

1. Barbey-Martin C, Gigant B, Bizebard T, Calder LJ, Wharton SA, Skehel JJ, Knossow M: **An antibody that prevents the hemagglutinin low pH fusogenic transition.** *Virology* 2002, **294**(1):70-74.
2. Bizebard T, Gigant B, Rigolet P, Rasmussen B, Diat O, Bosecke P, Wharton SA, Skehel JJ, Knossow M: **Structure of influenza virus haemagglutinin complexed with a neutralizing antibody.** *Nature* 1995, **376**(6535):92-94.
3. Fleury D, Barrere B, Bizebard T, Daniels RS, Skehel JJ, Knossow M: **A complex of influenza hemagglutinin with a neutralizing antibody that binds outside the virus receptor binding site.** *Nature Structural Biology* 1999, **6**(6):530-534.
4. Smith DJ, Lapedes AS, de Jong JC, Bestebroer TM, Rimmelzwaan GF, Osterhaus AD, Fouchier RA: **Mapping the antigenic and genetic evolution of influenza virus.** *SCIENCE* 2004, **305**(5682):371-376.
5. WHO: *Weekly Epidemiological Record* 1970-2007, **45, 46, 48, 49, 50, 51, 52, 55, 57, 58, 60, 61, 62, 63, 65, 66, 67, 68, 69, 70, 71, 73, 74, 78, 79, 80, 71, 82.**

6. Both GW, Sleight MJ, Cox NJ, Kendal AP: **Antigenic Drift in Influenza Virus-H3 Hemagglutinin from 1968 to 1980 - Multiple Evolutionary Pathways and Sequential Amino-Acid Changes at Key Antigenic Sites.** *J Virol* 1983, **48**(1):52-60.
7. Ellis JS, Chakraverty P, Clewley JP: **Genetic and antigenic variation in the haemagglutinin of recently circulating human influenza A (H3N2) viruses in the United Kingdom.** *Arch Virol* 1995, **140**(11):1889-1904.
8. Centers for Disease Control and Prevention: **Information for FDA vaccine advisory panel meeting. Atlanta: The Centers.** 1997:p. 30.
9. Coiras MT, Aguilar JC, Galiano M, Carlos S, Gregory V, Lin YP, Hay A, Perez-Brena P: **Rapid molecular analysis of the haemagglutinin gene of human influenza A H3N2 viruses isolated in Spain from 1996 to 2000.** *Archives of virology* 2001, **146**(11):2133-2147.
10. Centers for Disease Control and Prevention: **Information for the Vaccines and Related Biological Products Advisory Committee, CBER, FDA.** 2003-2007:p. 28, p.18, p.19, p.17.
11. Centers for Disease Control and Prevention: **Options for Live Attenuated Influenza Vaccines (LAIV) in the Control of Epidemic and Pandemic Influenza, Geneva, 12-13 June, 2007.** 2007:p. 11.
